# Supplementary material for: Assessment of a Risk Index for Suicide Attempts Among US Army Soldiers With Suicide Ideation: Analysis of Data From the Army Study to Assess Risk and Resilience in Servicemembers (Army STARRS)
Source: JAMA Netw Open. 2019 Mar 15;2(3):e190766. doi: 10.1001/jamanetworkopen.2019.0766 (PMC6484656; doi:10.1001/jamanetworkopen.2019.0766)
Supplement: Supplement. — eTable 1. Self-Reported Risk Factors for Subsequent Administratively Recorded Suicide Attempts Involving History of Self-Injurious Thoughts and Behaviors Among Regular Army Soldiers Who Reported Lifetime Suicide Ideation in the STARRS Consolidated All Army Survey (n = 3,649) eTable 2. Self-Reported Risk Factors of Subsequent Administratively Recorded Suicide Attempts Involving Severity of Self-Injurious Thoughts and Behaviors Among Regular Army Soldiers Who Reported Lifetime Suicide Ideation in the STARRS Consolidated All Army Survey (n = 3,649) eTable 3. Self-Reported Risk Factors of Subsequent Administratively Recorded Suicide Attempts Involving History of Mental Disorders Among Regular Army Soldiers Who Reported Lifetime Suicide Ideation in the STARRS Consolidated All Army Survey (n = 3,649) eTable 4. Self-Reported Risk Factors of Subsequent Administratively Recorded Suicide Attempts Involving Socio-Demographics and Army Career Characteristics Among Regular Army Soldiers Who Reported Lifetime Suicide Ideation in the STARRS Consolidated All Army Survey (n = 3,649) eTable 5. Hyperparameter Settings for Super Learner Ensemble [file jamanetwopen-2-e190766-s001.pdf]

## Supplementary Online Content

Zuromski KL, Bernecker SL, Gutierrez PM, et al. Assessment of a risk index for suicide attempts among US Army soldiers with suicide ideation: analysis of data from the Army Study to Assess Risk and Resilience in Servicemembers (Army STARRS). *JAMA Netw Open*. 2019;2(3):e190766. doi:10.1001/jamanetworkopen.2019.0766

**eTable 1.** Self-Reported Risk Factors for Subsequent Administratively Recorded Suicide Attempts Involving History of Self-Injurious Thoughts and Behaviors Among Regular Army Soldiers Who Reported Lifetime Suicide Ideation in the STARRS Consolidated All Army Survey (n = 3,649)

**eTable 2.** Self-Reported Risk Factors of Subsequent Administratively Recorded Suicide Attempts Involving Severity of Self-Injurious Thoughts and Behaviors Among Regular Army Soldiers Who Reported Lifetime Suicide Ideation in the STARRS Consolidated All Army Survey (n = 3,649)

**eTable 3.** Self-Reported Risk Factors of Subsequent Administratively Recorded Suicide Attempts Involving History of Mental Disorders Among Regular Army Soldiers Who Reported Lifetime Suicide Ideation in the STARRS Consolidated All Army Survey (n = 3,649)

**eTable 4.** Self-Reported Risk Factors of Subsequent Administratively Recorded Suicide Attempts Involving Socio-Demographics and Army Career Characteristics Among Regular Army Soldiers Who Reported Lifetime Suicide Ideation in the STARRS Consolidated All Army Survey (n = 3,649)

**eTable 5.** Hyperparameter Settings for Super Learner Ensemble

This supplementary material has been provided by the authors to give readers additional information about their work.

**eTable 1. Self-reported risk factors for subsequent administratively recorded suicide attempts involving history of self-injurious thoughts and behaviors among Regular Army soldiers who reported lifetime suicide ideation in the STARRS Consolidated All Army Survey (n = 3,649)<sup>a</sup>**

|                                              | Distribution |       | Univariate 1 <sup>b</sup> |            | Univariate 2 |            | Univariate 3 |            | Multivariate 1 <sup>c</sup> |            | Multivariate 2 <sup>d</sup> |            |
|----------------------------------------------|--------------|-------|---------------------------|------------|--------------|------------|--------------|------------|-----------------------------|------------|-----------------------------|------------|
|                                              | %            | (SE)  | OR                        | (95% CI)   | OR           | (95% CI)   | OR           | (95% CI)   | OR                          | (95% CI)   | OR                          | (95% CI)   |
| Ideation onset: ages 15-17 (vs. ≤14)         | 17.0         | (1.6) | 1.2                       | (0.4-3.6)  |              |            |              |            | 1.3                         | (0.4-4.3)  | 1.2                         | (0.4-3.7)  |
| Ideation onset: ages 18+ (vs. ≤14)           | 43.8         | (3.4) | 1.0                       | (0.3-3.1)  |              |            |              |            | 0.7                         | (0.2-2.7)  | 0.7                         | (0.2-2.7)  |
| F <sub>2</sub>                               |              |       | 0.1                       |            |              |            |              |            | 0.4                         |            | 0.2                         |            |
| Years since onset of ideation (values=1-11+) | 8.4          | (0.2) | 0.9                       | (0.8-1.1)  |              |            |              |            | 0.9                         | (0.8-1.1)  | 0.9                         | (0.8-1.1)  |
| Active ideation (vs. passive)                | 77.1         | (2.3) | 2.1                       | (0.5-9.1)  |              |            |              |            | 0.9                         | (0.2-4.8)  | 1.5                         | (0.3-7.5)  |
| Lifetime plan                                | 39.4         | (2.9) | 3.4*                      | (1.5-7.9)  |              |            |              |            | 2.0                         | (0.8-4.9)  |                             |            |
| Ideation recency: 30-day                     | 11.8         | (2.1) | 8.5*                      | (3.3-22.0) |              |            |              |            | 6.6*                        | (2.3-19.2) | 8.5*                        | (3.3-22.0) |
| Lifetime attempt                             | 19.7         | (2.5) | 4.0*                      | (1.7-9.3)  | 0.8          | (0.1-6.8)  |              |            |                             |            |                             |            |
| Number of attempts (values=0-2+, mean)       | 0.3          | (0.0) | 2.6*                      | (1.5-4.4)  | 3.0          | (0.8-11.5) | 2.3          | (0.8-6.7)  | 1.7                         | (0.9-3.2)  |                             |            |
| Count of attempts: Exactly 1 (vs. 0)         | 12.7         | (2.2) | 2.3                       | (0.8-6.7)  |              |            |              |            |                             |            |                             |            |
| Count of attempts: 2+ (vs. 0)                | 7.0          | (1.4) | 6.8*                      | (2.1-22.3) |              |            |              |            |                             |            |                             |            |
| F <sub>2</sub>                               |              |       | 5.0*                      |            |              |            |              |            |                             |            |                             |            |
| Count of attempts: 2+ (vs. 0 or 1)           | 7.0          | (1.4) |                           |            |              |            | 1.3          | (0.2-11.7) |                             |            |                             |            |

\*Significant at the .05 level, two-sided MI-adjusted test

<sup>a</sup>Results reflect weighted and multiply imputed (MI) data.

<sup>b</sup>The first univariate model included 2 predictors for ideation age-of-onset, 1 for years since ideation age-of-onset, and 1 for active (vs. passive) ideation. Each univariate OR presented thereafter controlled for these 4 predictors.

<sup>c</sup>Multivariate model 1 carried forward the 4 controls and significant predictors from the univariate analysis.

<sup>d</sup>Multivariate model 2 dropped the non-significant predictors from multivariate model 1.

**eTable 2. Self-reported risk factors of subsequent administratively recorded suicide attempts involving severity of self-injurious thoughts and behaviors among Regular Army soldiers who reported lifetime suicide ideation in the STARRS Consolidated All Army Survey (n = 3,649)<sup>a</sup>**

|                                                       | Distribution |       | Univariate |            | Multivariate 1 <sup>b</sup> |           | Multivariate 2 <sup>c</sup> |            |
|-------------------------------------------------------|--------------|-------|------------|------------|-----------------------------|-----------|-----------------------------|------------|
|                                                       | %            | (SE)  | OR         | (95% CI)   | OR                          | (95% CI)  | OR                          | (95% CI)   |
| Severity of suicidal ideation during worst week       |              |       |            |            |                             |           |                             |            |
| Days per week (vs. 1)                                 |              |       |            |            |                             |           |                             |            |
| 2                                                     | 13.8         | (1.7) | 1.3        | (0.2-8.9)  |                             |           |                             |            |
| 3                                                     | 14.7         | (1.7) | 2.2        | (0.2-15.1) |                             |           |                             |            |
| 4                                                     | 9.9          | (1.6) | 1.5        | (0.2-10.2) |                             |           |                             |            |
| 5                                                     | 7.9          | (0.9) | 1.5        | (0.2-10.2) |                             |           |                             |            |
| 6                                                     | 5.5          | (0.9) | 0.4        | (0.0-4.8)  |                             |           |                             |            |
| 7                                                     | 23.3         | (2.6) | 4.1        | (1.0-17.9) |                             |           |                             |            |
| F <sub>6</sub>                                        |              |       | 1.5        |            |                             |           |                             |            |
| 7 (vs. 6 or less)                                     | 23.3         | (2.6) | 3.0*       | (1.2-7.7)  | 2.1                         | (0.7-6.1) |                             |            |
| Time per day (vs. just a few moments)                 |              |       |            |            |                             |           |                             |            |
| Less than 1 hour                                      | 26.6         | (2.2) | 1.7        | (0.3-9.3)  |                             |           |                             |            |
| 1 to 4 hours                                          | 28.9         | (1.9) | 1.8        | (0.3-10.7) |                             |           |                             |            |
| 5 to 8 hours                                          | 11.0         | (1.7) | 2.8        | (0.6-13.1) |                             |           |                             |            |
| 9+ hours                                              | 11.2         | (2.0) | 6.4*       | (1.5-27.3) |                             |           |                             |            |
| F <sub>6</sub>                                        |              |       | 2.2        |            |                             |           |                             |            |
| 9+ hours (vs. ≤8 hours)                               | 11.2         | (2.0) | 3.6*       | (1.4-9.1)  | 2.2                         | (0.8-6.5) |                             |            |
| Worst week severity (vs. neither)                     |              |       |            |            |                             |           |                             |            |
| 7 days per week OR 9+ hours per day                   | 17.7         | (1.7) | 2.0        | (0.7-6.1)  |                             |           | 1.7                         | (0.5-5.4)  |
| 7 days per week AND 9+ hours per day                  | 8.4          | (1.9) | 4.8*       | (1.7-13.7) |                             |           | 3.8*                        | (1.1-12.5) |
| F <sub>2</sub>                                        |              |       | 4.0*       |            |                             |           | 2.3                         |            |
| 7 days per week AND/OR 9+ hours per day (vs. neither) | 26.1         | (1.8) | 3.0*       | (1.2-7.7)  |                             |           |                             |            |
| Controllability of thoughts (vs. easy)                |              |       |            |            |                             |           |                             |            |
| A little difficult                                    | 32.1         | (2.2) | 1.6        | (0.3-8.3)  |                             |           |                             |            |
| Somewhat difficult                                    | 19.1         | (2.5) | 2.6        | (0.6-11.7) |                             |           |                             |            |
| Very difficult                                        | 16.8         | (1.9) | 3.9        | (0.8-19.9) |                             |           |                             |            |
| Impossible                                            | 5.2          | (1.1) | 5.6        | (1.0-31.4) |                             |           |                             |            |
| F <sub>4</sub>                                        |              |       | 1.1        |            |                             |           |                             |            |

|                                                               |      |       |     |           |  |  |  |  |  |  |
|---------------------------------------------------------------|------|-------|-----|-----------|--|--|--|--|--|--|
| Very difficult to impossible (vs. somewhat difficult or less) | 22.0 | (1.3) | 1.5 | (0.5-4.5) |  |  |  |  |  |  |
| Any difficulty (vs. easy/no difficulty)                       | 73.2 | (1.1) | 1.8 | (0.4-7.6) |  |  |  |  |  |  |
| Frequency of tempting fate (reference: never)                 |      |       |     |           |  |  |  |  |  |  |
| Rarely                                                        | 28.4 | (3.0) | 2.2 | (0.6-7.8) |  |  |  |  |  |  |
| Sometimes                                                     | 14.2 | (1.5) | 2.5 | (0.7-9.3) |  |  |  |  |  |  |
| Often                                                         | 10.0 | (1.3) | 2.9 | (0.9-9.6) |  |  |  |  |  |  |
| F <sub>3</sub>                                                |      |       | 1.3 |           |  |  |  |  |  |  |
| Sometimes/often (vs. rarely/never)                            | 24.2 | (1.4) | 1.8 | (0.6-5.4) |  |  |  |  |  |  |
| Ever (vs. never)                                              | 52.6 | (1.6) | 2.5 | (0.9-6.6) |  |  |  |  |  |  |
| Lifetime presence of non-suicidal self-injury                 | 25.9 | (2.7) | 1.6 | (0.7-3.8) |  |  |  |  |  |  |

\*Significant at the .05 level, two-sided MI-adjusted test

<sup>a</sup>Results reflect weighted and multiply imputed (MI) data. All models controlled for ideation age-of-onset, years since ideation age-of-onset, active (vs. passive) ideation, and 30-day ideation recency (as defined in eTable 1) and time-varying rank (as defined in eTable 4).

<sup>b</sup>Multivariate model 1 included significant predictors from univariate models.

<sup>c</sup>Multivariate model 2 dropped the non-significant predictors from multivariate model 1.

**eTable 3. Self-reported risk factors of subsequent administratively recorded suicide attempts involving history of mental disorders among Regular Army soldiers who reported lifetime suicide ideation in the STARRS Consolidated All Army Survey (n = 3,649)<sup>a</sup>**

|                                                   | Distribution |       | Univariate 1 |             | Multivariate 1 <sup>b</sup> |            |
|---------------------------------------------------|--------------|-------|--------------|-------------|-----------------------------|------------|
|                                                   | %            | (SE)  | OR           | (95% CI)    | OR                          | (95% CI)   |
| <b>Mental disorders</b>                           |              |       |              |             |                             |            |
| Internalizing                                     |              |       |              |             |                             |            |
| Major depressive episode                          | 72.2         | (2.0) | 4.5          | (0.3-39.8)  | 2.3                         | (0.2-24.6) |
| Generalized anxiety disorder                      | 59.7         | (2.5) | 2.2          | (0.8-5.9)   | 0.9                         | (0.3-2.7)  |
| Post-traumatic stress disorder                    | 65.5         | (2.3) | 6.8*         | (1.1-40.1)  | 4.6                         | (0.6-32.6) |
| Bipolar disorder                                  | 8.7          | (1.2) | 2.4          | (0.8-7.2)   | 1.9                         | (0.6-6.2)  |
| Panic disorder                                    | 11.1         | (1.6) | 0.8          | (0.3-1.8)   | 0.5                         | (0.2-1.2)  |
| Any                                               | 88.8         | (1.6) | 34.1*        | (8.5-137.3) |                             |            |
| F <sub>5/4</sub>                                  |              |       |              |             | 1.6                         |            |
| Externalizing                                     |              |       |              |             |                             |            |
| Intermittent explosive disorder                   | 42.7         | (2.0) | 1.1          | (0.5-2.8)   | 0.8                         | (0.3-1.9)  |
| Attention-deficit/hyperactivity disorder          | 15.6         | (2.4) | 2.9*         | (1.2-6.9)   | 2.5                         | (1.0-6.6)  |
| Substance use disorder                            | 27.9         | (2.0) | 2.0          | (0.7-5.4)   | 1.5                         | (0.5-4.5)  |
| Any                                               | 53.3         | (1.9) | 5.3*         | (1.3-21.4)  |                             |            |
| F <sub>3</sub>                                    |              |       |              |             | 1.4                         |            |
| F <sub>8</sub>                                    |              |       |              |             | 1.4                         |            |
| Total                                             |              |       |              |             |                             |            |
| Any mental disorder                               | 92.3         | (1.1) | 51.6*        | (6.2-427.1) |                             |            |
| Summary measure 1                                 |              |       |              |             |                             |            |
| Count of mental disorders: Exactly 1 or 2 (vs. 0) | 29.5         | (1.4) | 24.0*        | (1.6-351.1) |                             |            |
| Count of mental disorders: 3+ (vs. 0)             | 62.8         | (1.2) | 62.9*        | (7.8-506.5) |                             |            |
| F <sub>2</sub>                                    |              |       |              | 8.1*        |                             |            |
| Summary measure 2                                 |              |       |              |             |                             |            |
| Count of mental disorders: 2+ (vs. 0 or 1)        | 79.6         | (1.5) | 32.5*        | (7.9-134.3) |                             |            |
| Summary measure 3                                 |              |       |              |             |                             |            |
| Count of mental disorders: Exactly 1 (vs. 0)      | 12.8         | (1.5) | 2.4          | (0.2-33.0)  |                             |            |
| Count of mental disorders: Exactly 2 (vs. 0)      | 16.8         | (1.6) | 39.9*        | (2.6-621.9) |                             |            |

|                                              |      |       |  |       |              |  |  |  |
|----------------------------------------------|------|-------|--|-------|--------------|--|--|--|
| Count of mental disorders: Exactly 3 (vs. 0) | 24.7 | (2.5) |  | 33.7* | (3.5-328.1)  |  |  |  |
| Count of mental disorders: Exactly 4 (vs. 0) | 19.2 | (2.1) |  | 61.8* | (6.9-556.0)  |  |  |  |
| Count of mental disorders: 5+ (vs. 0)        | 18.9 | (1.8) |  | 99.2* | (11.7-843.3) |  |  |  |
| F <sub>(3,172)</sub>                         |      |       |  | 6.0*  |              |  |  |  |
|                                              |      |       |  |       |              |  |  |  |

\*Significant at the .05 level, two-sided MI-adjusted test

<sup>a</sup>Results reflect weighted and multiply imputed (MI) data. All models controlled for ideation age-of-onset, years since ideation age-of-onset, active (vs. passive) ideation, and 30-day ideation recency (as defined in eTable 1) and time-varying rank (as defined in eTable 2).

<sup>b</sup>Multivariate model 1 entered all 8 mental disorders as predictors in the model.

**eTable 4. Self-reported risk factors of subsequent administratively recorded suicide attempts involving socio-demographics and Army career characteristics among Regular Army soldiers who reported lifetime suicide ideation in the STARRS Consolidated All Army Survey (n = 3,649)<sup>a</sup>**

|                                              | Distribution |       | Univariate |             | Multivariate 1 |             |
|----------------------------------------------|--------------|-------|------------|-------------|----------------|-------------|
|                                              | %            | (SE)  | OR         | (95% CI)    | OR             | (95% CI)    |
| <b>Socio-demographics</b>                    |              |       |            |             |                |             |
| Age (mean, in decades)                       | 3.1          | (0.0) | 0.5*       | (0.3-1.0)   | 1.3            | (0.4-4.5)   |
| Sex: female (vs. male)                       | 19.5         | (1.7) | 0.9        | (0.3-2.6)   |                |             |
| Race (vs. Non-Hispanic white)                |              |       |            |             |                |             |
| Non-Hispanic black                           | 14.6         | (1.7) | 2.5        | (0.8-7.8)   |                |             |
| Hispanic                                     | 9.0          | (1.1) | 0.3        | (0.1-1.5)   |                |             |
| Other                                        | 7.0          | (1.2) | 0.4        | (0.0-3.9)   |                |             |
| F <sub>3</sub>                               |              |       | 2.3        |             |                |             |
| Marital history (vs. currently)              |              |       |            |             |                |             |
| Previously                                   | 9.2          | (1.6) | 0.7        | (0.2-2.7)   |                |             |
| Never                                        | 25.1         | (2.6) | 0.9        | (0.3-2.6)   |                |             |
| F <sub>2</sub>                               |              |       | 0.2        |             |                |             |
| <b>Army career characteristics</b>           |              |       |            |             |                |             |
| Current years of service (means, in decades) | 0.9          | (0.0) | 0.4*       | (0.2-0.9)   | 1.0            | (0.2-4.0)   |
| MOS (vs. combat service support)             |              |       |            |             |                |             |
| Combat arms                                  | 34.5         | (2.2) | 0.7        | (0.3-1.5)   |                |             |
| Combat support                               | 22.5         | (2.1) | 0.5        | (0.1-2.1)   |                |             |
| F <sub>2</sub>                               |              |       | 0.7        |             |                |             |
| Rank (vs. officer)                           |              |       |            |             |                |             |
| Junior                                       | 32.9         | (2.8) | 33.7*      | (3.4-285.6) | 42.6*          | (2.8-649.7) |
| Senior                                       | 45.4         | (2.9) | 8.3*       | (1.0-68.5)  | 9.4            | (0.9-94.4)  |
| F <sub>2</sub>                               |              |       | 7.6*       |             | 4.3*           |             |
| Deployment (vs. never)                       |              |       |            |             |                |             |
| Currently                                    | 9.6          | (1.6) | 0.5        | (0.1-3.1)   |                |             |
| Previously                                   | 69.8         | (2.8) | 1.0        | (0.4-2.7)   |                |             |
| F <sub>2</sub>                               |              |       | 0.4        |             |                |             |

\*Significant at the .05 level, two-sided MI-adjusted test

<sup>a</sup>Results reflect weighted and multiply imputed (MI) data. All models controlled for ideation age-of-onset, years since ideation age-of-onset, active (vs. passive) ideation, and 30-day ideation recency (as defined in eTable 1) and time-varying rank (as defined in eTable 2)

| eTable 5. Hyperparameter settings for Super Learner ensemble <sup>a</sup> |                       |         |         |         |   |         |
|---------------------------------------------------------------------------|-----------------------|---------|---------|---------|---|---------|
|                                                                           | External fold weights |         |         |         |   |         |
|                                                                           | 1                     | 2       | 3       | 4       | 5 |         |
| Generalized linear models <sup>b</sup>                                    |                       |         |         |         |   |         |
| Screener = $p < .1$                                                       | 0.03056               | 0.02668 | 0.02473 | 0.02272 |   | 0.01664 |
| Screener = LASSO, Minimum 5                                               | 0.03056               | 0.02474 | 0.02473 | 0.02389 |   | 0.01664 |
| Screener = All                                                            | 0.02993               | 0.02839 | 0.02552 | 0.02274 |   | 0.01664 |
| Elastic net penalized regression <sup>c</sup>                             |                       |         |         |         |   |         |
| Alpha = 0                                                                 | 0.02993               | 0.02839 | 0.02549 | 0.02387 |   | 0.01731 |
| Alpha = 0.1                                                               | 0.03076               | 0.02839 | 0.02549 | 0.02271 |   | 0.01731 |
| Alpha = 0.2                                                               | 0.03090               | 0.02839 | 0.02549 | 0.02387 |   | 0.01731 |
| Alpha = 0.3                                                               | 0.03090               | 0.02839 | 0.02549 | 0.02269 |   | 0.01731 |
| Alpha = 0.4                                                               | 0.03076               | 0.02839 | 0.02579 | 0.02269 |   | 0.01731 |
| Alpha = 0.5                                                               | 0.03076               | 0.02839 | 0.02549 | 0.02271 |   | 0.01731 |
| Alpha = 0.6                                                               | 0.03076               | 0.02839 | 0.02549 | 0.02389 |   | 0.01731 |
| Alpha = 0.7                                                               | 0.03076               | 0.02839 | 0.02549 | 0.02271 |   | 0.01731 |
| Alpha = 0.8                                                               | 0.03076               | 0.02839 | 0.02549 | 0.02269 |   | 0.01731 |
| Alpha = 0.9                                                               | 0.03076               | 0.02839 | 0.02473 | 0.02269 |   | 0.01731 |
| Generalized Additive Models <sup>d</sup>                                  |                       |         |         |         |   |         |
| Target degrees of freedom = 3                                             | 0.02836               | 0.02839 | 0.02530 | 0.02710 |   | 0.01741 |
| Target degrees of freedom = 4                                             | 0.02836               | 0.03010 | 0.02515 | 0.02822 |   | 0.01741 |
| Target degrees of freedom = 5                                             | 0.02836               | 0.03010 | 0.02515 | 0.02813 |   | 0.01741 |
| Target degrees of freedom = 6                                             | 0.02836               | 0.02795 | 0.02500 | 0.03001 |   | 0.01741 |
| Linear multivariate adaptive regression splines <sup>e</sup>              |                       |         |         |         |   |         |
| Screener $p < .1$                                                         | 0.05596               | 0.09909 | 0.01135 | 0.07711 |   | 0.12819 |
| Screener LASSO, minimum 5                                                 | 0.00000               | 0.08240 | 0.06152 | 0.01091 |   | 0.01315 |
| Random Forests <sup>f</sup>                                               |                       |         |         |         |   |         |
| ntree = 8000                                                              | 0.03883               | 0.05118 | 0.02608 | 0.11847 |   | 0.11051 |
| ntree = 10000                                                             | 0.04602               | 0.04216 | 0.04328 | 0.11542 |   | 0.11256 |
| Support Vector Machines <sup>g</sup>                                      |                       |         |         |         |   |         |
| Radial kernel, Cost = 1,000                                               | 0.01982               | 0.00000 | 0.04910 | 0.00017 |   | 0.00000 |
| Radial kernel, Cost = 1,500                                               | 0.02735               | 0.00000 | 0.01004 | 0.00022 |   | 0.00814 |
| Polynomial kernel, Cost = 1,000, Coef() = 2                               | 0.07483               | 0.04146 | 0.05961 | 0.02964 |   | 0.00874 |
| Polynomial kernel, Cost = 1,000, Coef() = 4                               | 0.03521               | 0.05341 | 0.05045 | 0.08302 |   | 0.07118 |
| Polynomial kernel, Cost = 10,000, Coef() = 2                              | 0.06961               | 0.00024 | 0.04763 | 0.06303 |   | 0.03083 |
| Polynomial kernel, Cost = 10,000, Coef() = 4                              | 0.01430               | 0.06869 | 0.05434 | 0.05545 |   | 0.04805 |
| Bayesian Additive Regression Trees <sup>h</sup>                           |                       |         |         |         |   |         |
| Number of trees = 25                                                      | 0.02074               | 0.00000 | 0.01310 | 0.02291 |   | 0.00888 |
| Number of trees = 50                                                      | 0.02635               | 0.00000 | 0.00000 | 0.00088 |   | 0.01825 |
| Number of trees = 75                                                      | 0.00000               | 0.02709 | 0.05672 | 0.00044 |   | 0.08347 |
| Regularized gradient boosting <sup>i</sup>                                |                       |         |         |         |   |         |
| Number of trees = 30,000                                                  | 0.02978               | 0.02143 | 0.03800 | 0.00237 |   | 0.03268 |
| Number of trees = 40,000                                                  | 0.02986               | 0.03258 | 0.04850 | 0.00664 |   | 0.03268 |

<sup>a</sup>The Super Learner optimization method used 1 - cvAUC as the loss function to be optimized. This method returns low non-zero weights rather than zero weights for poor-performing classifiers. As a result, Super Learner usually performs better when poor-performing classifiers are not included in the library. Based on this fact, we excluded the following classifiers because of preliminary evidence of

poor performance in a larger original library: polynomial multivariate adaptive regression splines, neural networks, and support vector machines with a linear kernel.

<sup>b</sup>McCullagh P, Nelder JA. *Generalized Linear Models*. 2nd ed. Chapman & Hall/CRC Monographs on Statistics & Applied Probability Series, #37. Taylor & Francis; 1989.

<sup>c</sup>Zou H, Hastie T. Regularization and variable selection via the elastic net. *J R Stat Soc Series B Stat Methodol*. 2005;67(2):301-320. doi:10.1111/j.1467-9868.2005.00503.x

<sup>d</sup>Hastie TJ, Tibshirani RJ. *Generalized Additive Models*. 1<sup>st</sup> ed. Chapman & Hall/CRC Monographs on Statistics and Applied Probability, #43; 1990.

<sup>e</sup>Friedman JH. Multivariate adaptive regression splines. *The Annals of Statistics*. 1991;19(1):1-67. doi:10.1214/aos/1176347963

<sup>f</sup>Breiman L. Random forests. *Machine Learning*. 2001;45(1):5-32. doi:10.1023/a:1010933404324

<sup>g</sup>Steinwart I, Christmann A. *Support Vector Machines*. New York, NY: Springer-Verlag New York; 2008.

<sup>h</sup>Chipman H, George EI, McCulloch R. BART: Bayesian additive regression trees. *Ann Appl Stat*. 2010;4(1):266-298. doi:10.1214/09-aos285
